# Supplementary material for: ACTIVExtend: 24 Months of Alendronate After 18 Months of Abaloparatide or Placebo for Postmenopausal Osteoporosis
Source: PubMed Central journal article supplement (PMC6097601; doi:10.1210/jc.2018-00163), 2018-05-24
Supplement: jc.2018-00163.st1.pdf [file jc.2018-00163.st1.pdf]

**Supplemental Table 1.** Kaplan-Meier Rates of Nonvertebral Fracture Endpoints.

| Fracture type             | ACTIVEExtend ITT, Cumulative Treatment Months 0 to 43 |                | ACTIVEExtend Only, Cumulative Treatment Months 19 to 43 |                | ACTIVE ITT + ACTIVEExtend ITT, Cumulative Treatment Months 0 to 43 |                      |
|---------------------------|-------------------------------------------------------|----------------|---------------------------------------------------------|----------------|--------------------------------------------------------------------|----------------------|
|                           | PBO/ALN, n=581                                        | ABL/ALN, n=558 | PBO/ALN, n=581                                          | ABL/ALN, n=558 | PBO + PBO/ALN, n=821                                               | ABL + ABL/ALN, n=824 |
| <b>Nonvertebral</b>       |                                                       |                |                                                         |                |                                                                    |                      |
| Participants, n           | 45                                                    | 27             | 20                                                      | 15             | 53                                                                 | 33                   |
| KM rate, %                | 8.0                                                   | 5.0            | 3.7                                                     | 2.8            | 8.4                                                                | 5.5                  |
| HR (95% CI)               | 0.61 (0.38, 0.98)                                     |                | 0.76 (0.39, 1.49)                                       |                | 0.63 (0.41, 0.98)                                                  |                      |
| P-value                   | 0.038                                                 |                | 0.422                                                   |                | 0.038                                                              |                      |
| <b>Clinical</b>           |                                                       |                |                                                         |                |                                                                    |                      |
| Participants, n           | 58                                                    | 38             | 24                                                      | 23             | 72                                                                 | 49                   |
| KM rate, %                | 10.4                                                  | 7.0            | 4.6                                                     | 4.3            | 11.3                                                               | 8.1                  |
| HR (95% CI)               | 0.66 (0.44, 0.99)                                     |                | 0.98 (0.55, 1.73)                                       |                | 0.69 (0.48, 0.99)                                                  |                      |
| P-value                   | 0.045                                                 |                | 0.941                                                   |                | 0.045                                                              |                      |
| <b>Major osteoporotic</b> |                                                       |                |                                                         |                |                                                                    |                      |
| Participants, n           | 40                                                    | 20             | 17                                                      | 12             | 51                                                                 | 21                   |
| KM rate, %                | 7.2                                                   | 3.7            | 3.2                                                     | 2.3            | 8.2                                                                | 3.5                  |
| HR (95% CI)               | 0.50 (0.30, 0.86)                                     |                | 0.72 (0.34, 1.50)                                       |                | 0.42 (0.25, 0.70)                                                  |                      |
| P-value                   | 0.011                                                 |                | 0.374                                                   |                | <0.001                                                             |                      |
| <b>Hip</b>                |                                                       |                |                                                         |                |                                                                    |                      |
| Participants, n           | 3                                                     | 0              | 3                                                       | 0              | 5                                                                  | 0                    |
| KM rate, %                | 0.6                                                   | 0              | 0.6                                                     | 0              | 0.8                                                                | 0                    |
| HR (95% CI)               | NE                                                    |                | NE                                                      |                | NE                                                                 |                      |
| P-value                   | 0.085                                                 |                | 0.086                                                   |                | 0.027                                                              |                      |

Abbreviations: **ABL**, abaloparatide; **ALN**, alendronate; **HR**, hazard ratio; **ITT**, intent-to-treat; **KM**, Kaplan-Meier; **NE**, not evaluable; **PBO**, placebo.
